# Supplementary material for: Anti-Obesity Therapeutic Targets Studied In Silico and In Vivo: A Systematic Review
Source: MDPI journal article supplement (doi:10.3390/ijms25094699), 2024-04-25
Supplement: s1 [file s1]

**Table S1** – Form for assessing the risk of bias in in silico studies.

| Bias Domain          | Issue                                                                                                     | Low Risk of Bias                                                      | High Risk of Bias                                                                            | Unclear Risk of Bias |
|----------------------|-----------------------------------------------------------------------------------------------------------|-----------------------------------------------------------------------|----------------------------------------------------------------------------------------------|----------------------|
| Ligand selection     | Ligand filtering                                                                                          | Should be performed                                                   | Did not applied                                                                              | No data              |
| Ligands optimization | Ionization assessment                                                                                     | The ligands were ionized according to pKa and pH values of media      | The research was performed without reference to pKa values of ligands and pH values of media | No data              |
|                      | Generation of energetically possible conformations                                                        | Should be performed                                                   | Generation was performed without reference to potential energy calculation                   | No data              |
| Target selection     | Resolution of protein structure                                                                           | Not more than 2.5 Å                                                   | More than 2.5 Å                                                                              | No data              |
|                      | Method of protein target structure obtaining                                                              | NMR spectroscopy or X-ray crystallography                             | Cryogenic electron microscopy or modeling                                                    | No data              |
| Target optimization  | Control of histidine protonation                                                                          | Should be performed                                                   | The structure of target did not reference biological conditions                              | No data              |
|                      | Protonation of amino acids after X-ray crystallography or cryogenic electron microscopy                   | Should be performed                                                   | The structure of target did not reference biological conditions                              | No data              |
|                      | Addition of missing residues and side chains after X-ray crystallography or cryogenic electron microscopy | Should be performed                                                   | Was performed without special tools                                                          | No data              |
|                      | Addition of metals                                                                                        | Should be performed                                                   | The structure of target did not reference biological conditions                              | No data              |
|                      | <i>Molecular docking software</i>                                                                         | Glide, GOLD                                                           | AutoDock, DOCK, FlexX                                                                        | No data              |
| Results assessment   | Visual control                                                                                            | Should be performed                                                   | Structure defects were observed                                                              | No data              |
|                      | Re-docking                                                                                                | Should be performed                                                   | The RMSD value is too high compared with the initial structure                               | No data              |
|                      | Verification of docking results by in vitro study <i>in vitro</i> ou <i>in vivo</i>                       | Binding constant should be determined or performing an in vivo study. | The quantitative calculations were not performed                                             | No data              |

**Source:** Adapted from Taldaev and collaborators by the author (22).
