# Supplementary material for: Anti-Obesity Therapeutic Targets Studied In Silico and In Vivo: A Systematic Review
Source: MDPI journal article supplement (doi:10.3390/ijms25094699), 2024-04-25
Supplement: s1 [file s1]

**Table S2.** Main therapeutic agents employed in in silico studies along with their respective chemical structures and/or formulas.

| Study/ Year/<br>References                        | Class/Source                                                            | Main therapeutic agents used within in silico studies                                                                                                                                                                                                    |
|---------------------------------------------------|-------------------------------------------------------------------------|----------------------------------------------------------------------------------------------------------------------------------------------------------------------------------------------------------------------------------------------------------|
| Birari <i>et al</i> 2011.,<br>[32]                | Flavonoids, Roots of<br><i>Glycyrrhiza glabra</i>                       | Isoliquiritigenin (7) <sup>a</sup> and Licuroside (10) <sup>a</sup> :<br>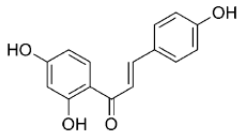<br>7                                                                                          |
|                                                   |                                                                         | <br>10                                                                                                                                                                  |
| Coronado-<br>Cáceres <i>et al.</i> ,<br>2020 [33] | Peptides, Seeds of<br><i>Theobroma cacao</i> L                          | Cocoa ( <i>Theobroma cacao</i> L.) peptide EEQR <sup>a</sup>                                                                                                                                                                                             |
| El-Korany <i>et al.</i> ,<br>2020 [34]            | Organic acid, <i>Aspergillus</i><br><i>oryzae</i>                       | Kojic acid <sup>b</sup>                                                                                                                                                                                                                                  |
| Yakaiah <i>et al.</i> ,<br>2021 [35]              | Heterocyclic Organic<br>Compound, Seeds of<br><i>Myristica fragrans</i> | Tetrahydrofuran <sup>b</sup>                                                                                                                                                                                                                             |
| Elekofehinti <i>et</i><br><i>al.</i> , 2020 [36]  | Alkaloids, <i>Annona</i><br><i>muricata</i> (Annonaceae)                | Annonioside <sup>b</sup> and Annonaine <sup>b</sup>                                                                                                                                                                                                      |
| Yaccoubi <i>et al.</i> ,<br>2022<br>[37]          | Tiadiazinona derivative,<br>synthetic                                   | Bis-fused thiadiazinones 16 <sup>a</sup> and 18 <sup>a</sup><br><br>18<br><br>16 |
| Fajriaty <i>et al.</i> ,<br>2023 [38]             | Phytochemicals,<br><i>Calophyllum soulattri</i>                         | Caloxanthone B <sup>a</sup><br>                                                                                                                                       |
| Khan <i>et al.</i> , 2023<br>[39]                 | Linoleic acid derivatives,<br>synthetic                                 | NKS-5 <sup>a</sup> : (9Z,12Z)-(3-methyloxetan-3-yl) methyl octadeca-9,12-dienoate<br><br>NKS-5                                                                        |

|                                  |                                                               |                                                                                                                                                                                                                                                                                                                                            |
|----------------------------------|---------------------------------------------------------------|--------------------------------------------------------------------------------------------------------------------------------------------------------------------------------------------------------------------------------------------------------------------------------------------------------------------------------------------|
| Lee <i>et al.</i> , 2008 [40]    | Biarylpyrazolyl oxadiazole analogues, synthetic               | 43c <sup>a</sup> : 2-(4-((1H-1,2,4-triazol-1-yl)methyl)-5-(4-bromophenyl)-1-(2,4-dichlorophenyl)-1H-pyrazol-3-yl)-5-(1-(trifluoromethyl)cyclopropyl)-1,3,4-oxadiazole                                                                                                                                                                      |
| Ghareb <i>et al.</i> , 2019 [41] | <b>Benzenesulfonamide derivatives, synthetic</b>              | MS-13 <sup>a</sup> and MS-14 <sup>a</sup> :<br><div style="text-align: center;"> 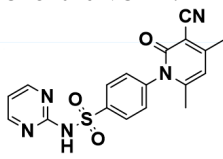<br/> <b>MSE-13</b> </div> <div style="text-align: center;"> <br/> <b>MSE-14</b> </div> |
| Chen <i>et al.</i> , 2022 [42]   | Short chain fatty acids (SCFAs), bacterial fiber fermentation | Butyrate <sup>b</sup>                                                                                                                                                                                                                                                                                                                      |
| Kang <i>et al</i> 2022 [43]      | Florotanins, Algae <i>Ishige okamurae</i> (Yendo)             | Ishophloroglucin A <sup>a</sup><br><div style="text-align: center;">  </div>                                                                                                                                                                            |

<sup>a</sup> Chemical structure and/or formula obtained in the original article

<sup>b</sup> Chemical structure and/or formula not obtained in the original article
